# Supplementary material
Source: publisher figshare collection journal article supplement (https://tandf.figshare.com/articles/dataset/_/1627934)

184B5 : CI-52

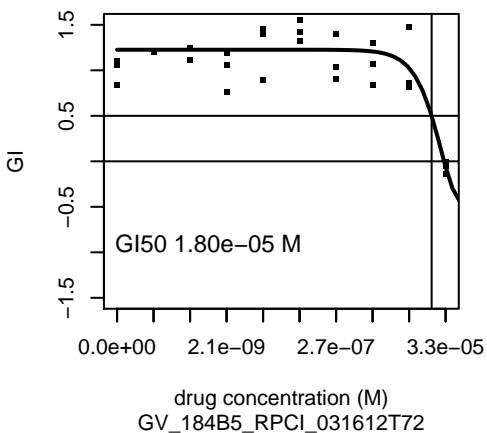

21MT1 : CI-52

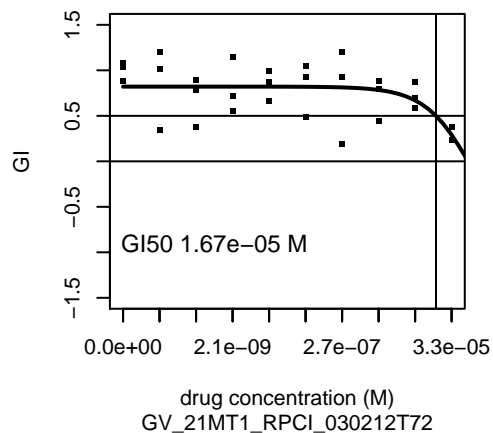

21MT2 : CI-52

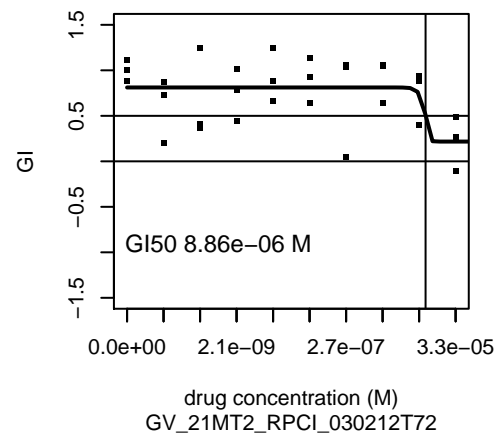

21NT : CI-52

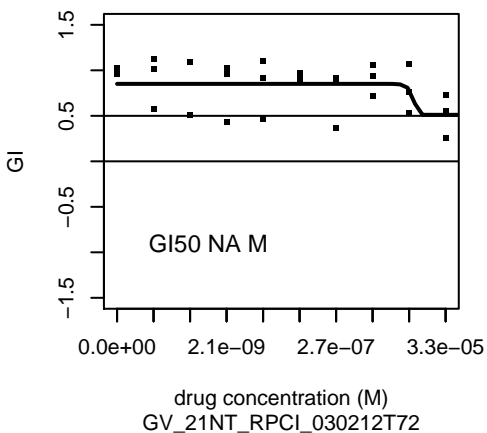

21NT : CI-52

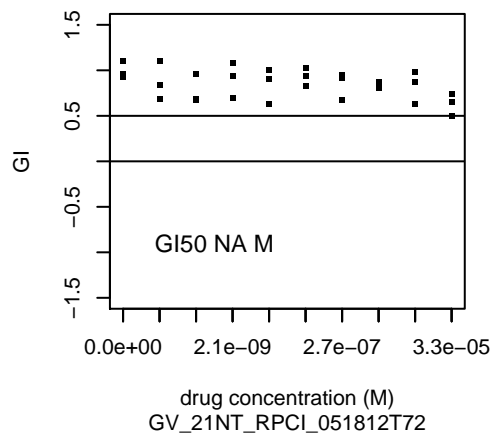

21PT : CI-52

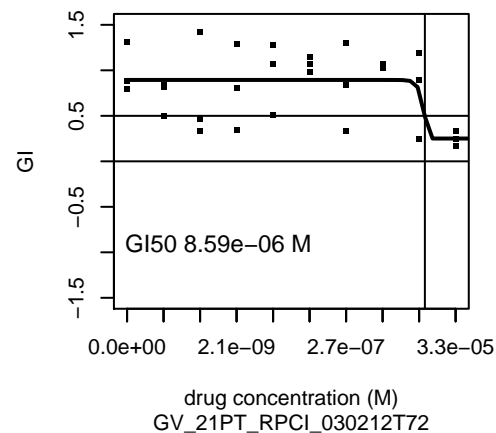

AU565 : CI-52

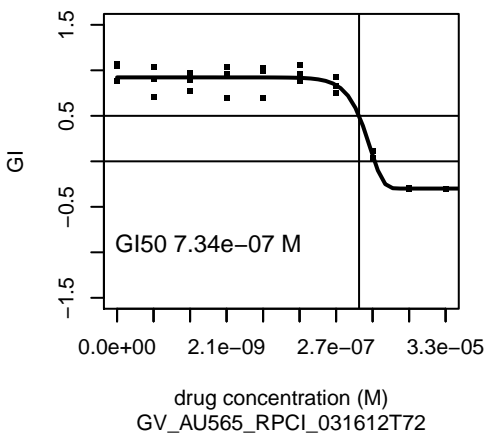

AU565 : CI-52

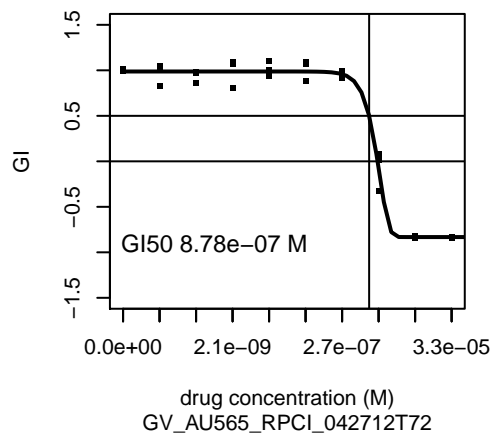

BT474 : CI-52

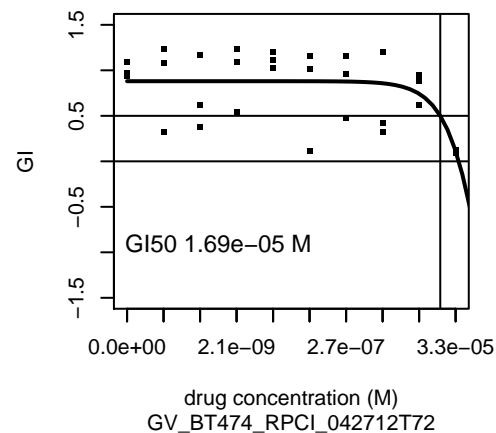

CAL148 : CI-52

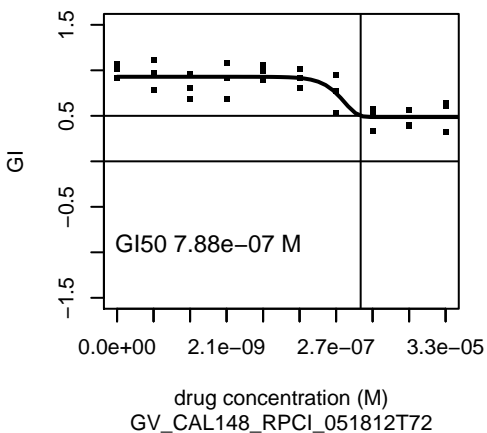

CAL85-1 : CI-52

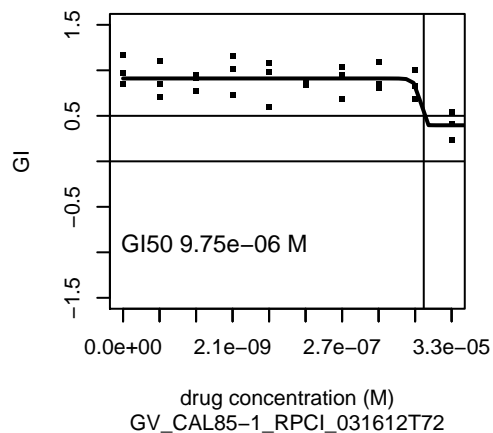

CAMA1 : CI-52

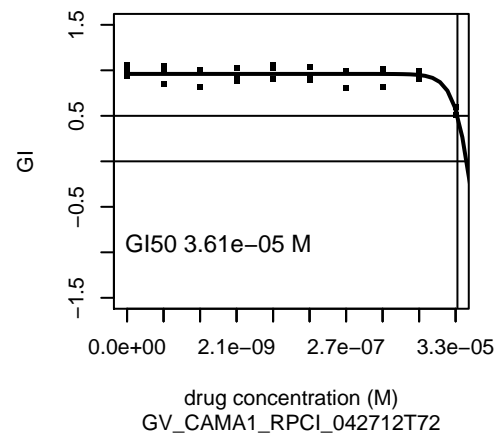

EFM192A : CI-52

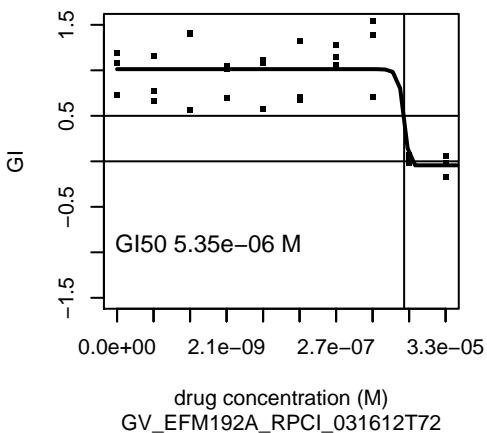

EFM192B : CI-52

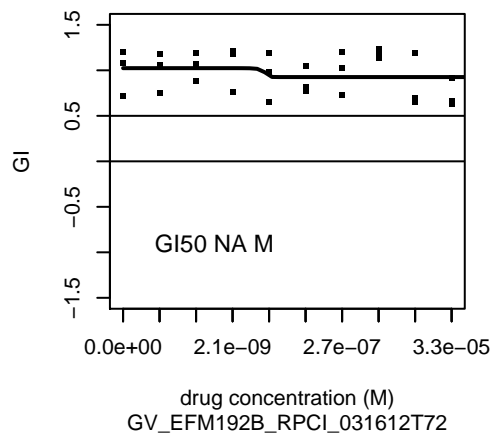

EVSA1 : CI-52

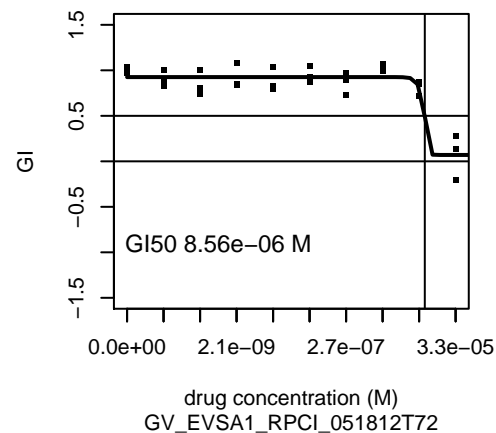

HCC1143 : CI-52

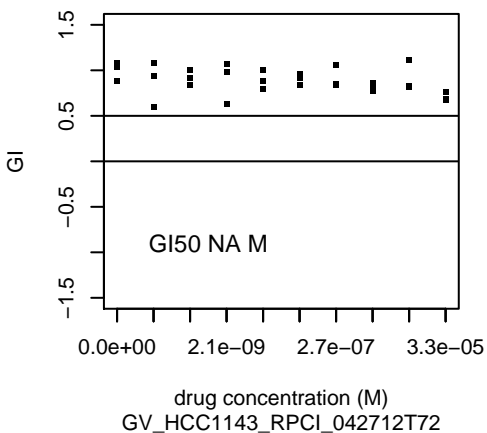

HCC1187 : CI-52

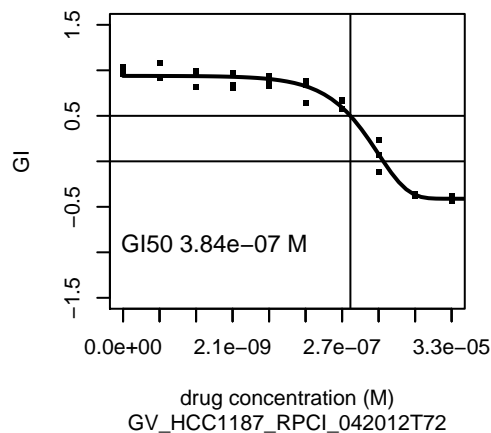

HCC1395 : CI-52

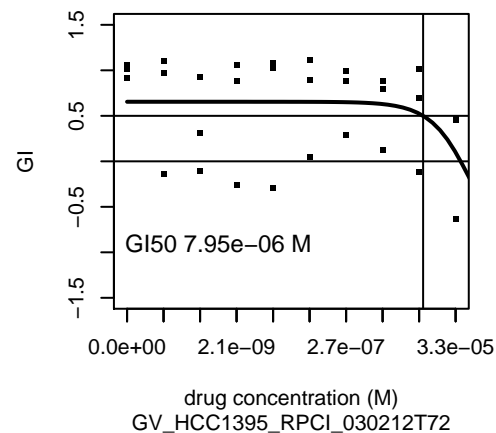

HCC1419 : CI-52

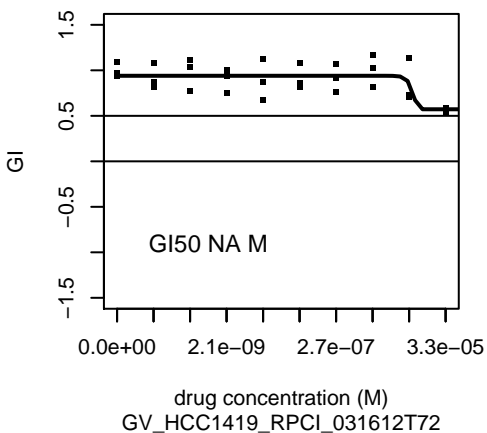

HCC1500 : CI-52

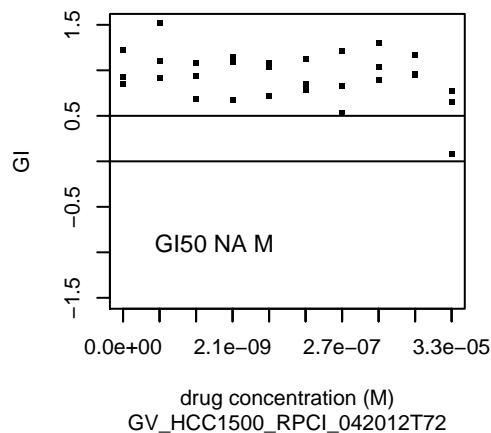

HCC1569 : CI-52

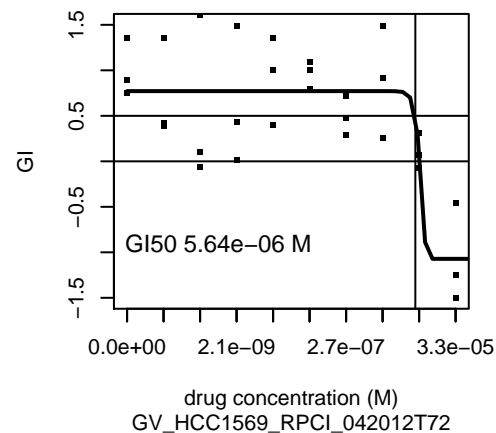

HCC202 : CI-52

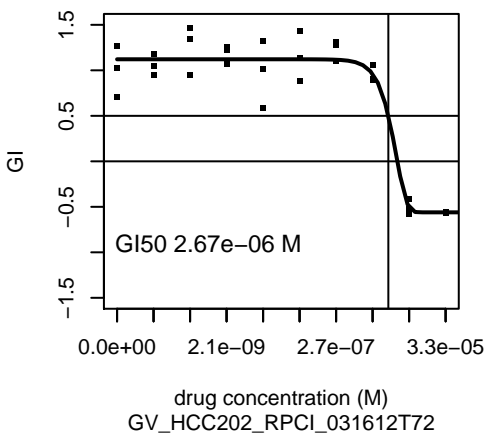

HCC3153 : CI-52

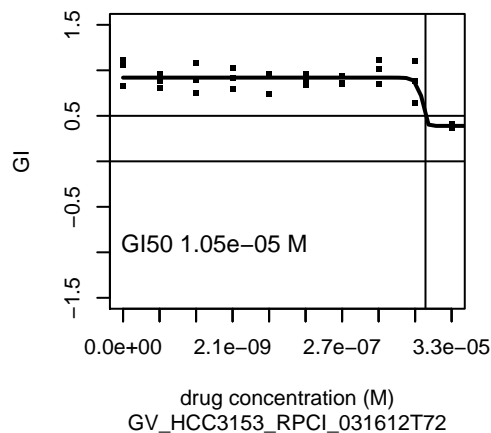

HCC3153 : CI-52

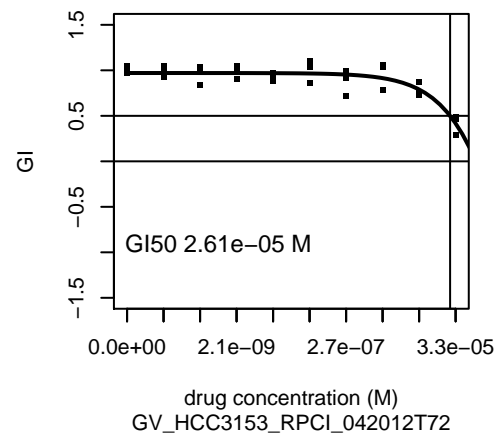

**JIMT1 : CI-52**

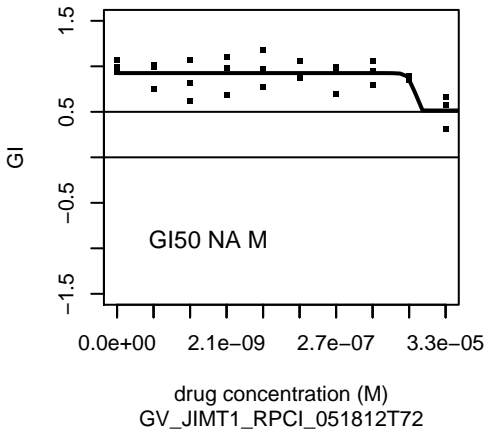

**LY2 : CI-52**

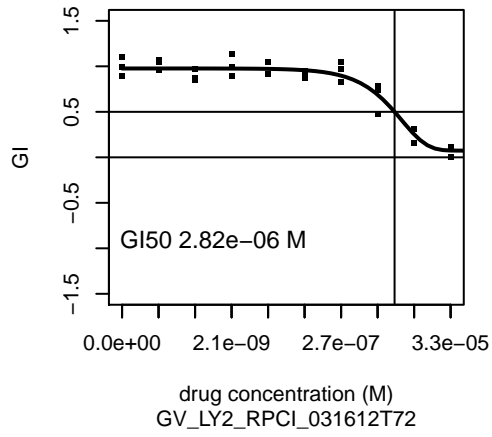

**LY2 : CI-52**

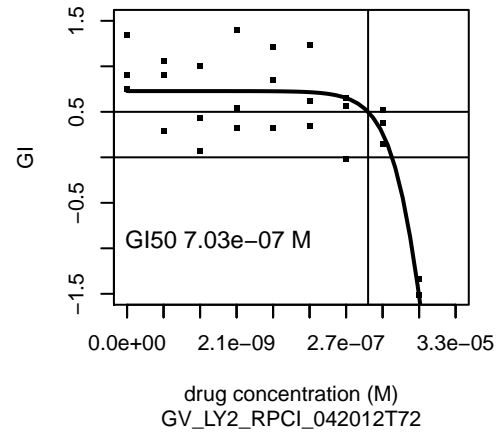

**MCF10F : CI-52**

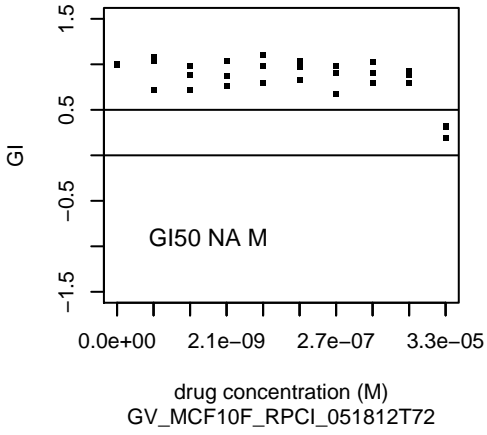

**MDAMB134VI : CI-52**

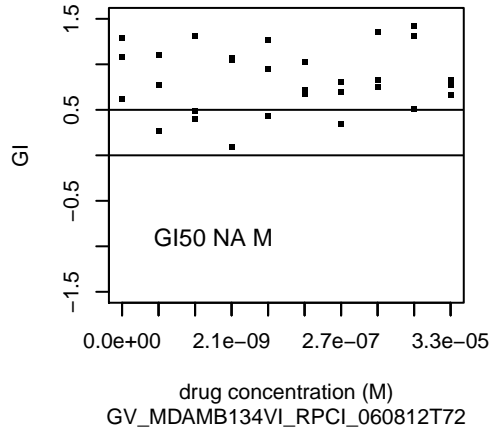

**MDAMB157 : CI-52**

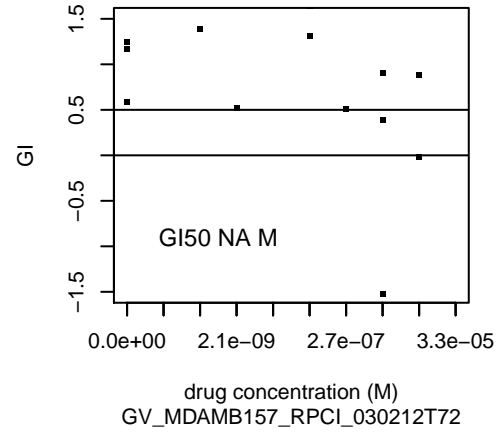

**MDAMB157 : CI-52**

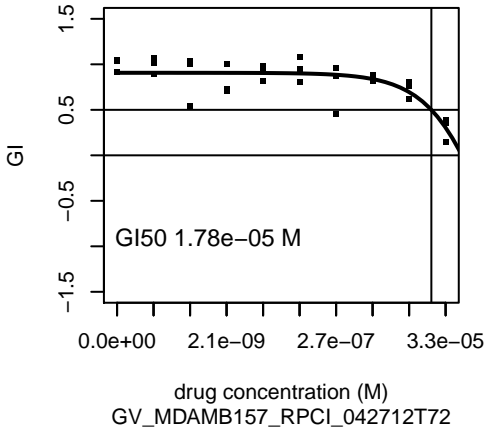

**MDAMB231 : CI-52**

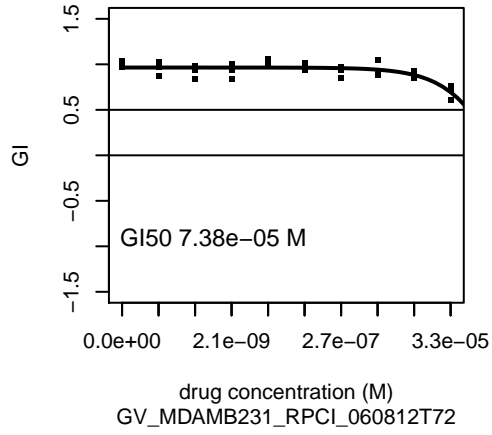

**MDAMB361 : CI-52**

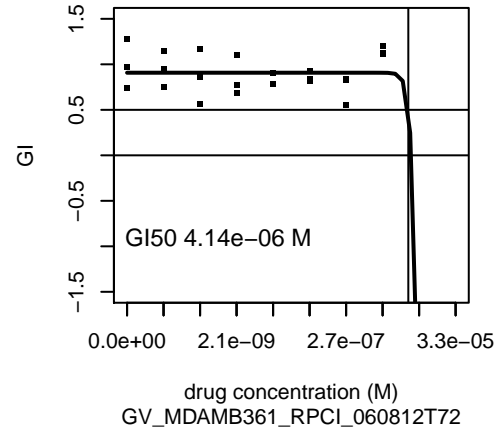

**MDAMB415 : CI-52**

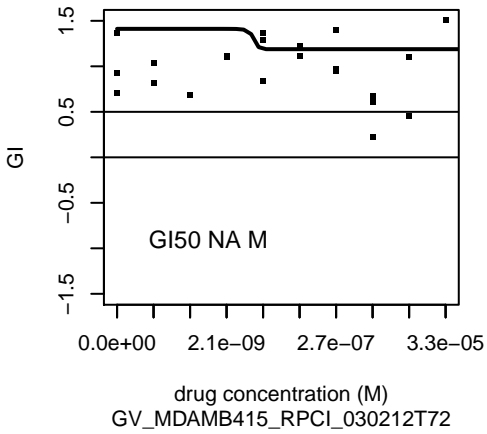

**MDAMB415 : CI-52**

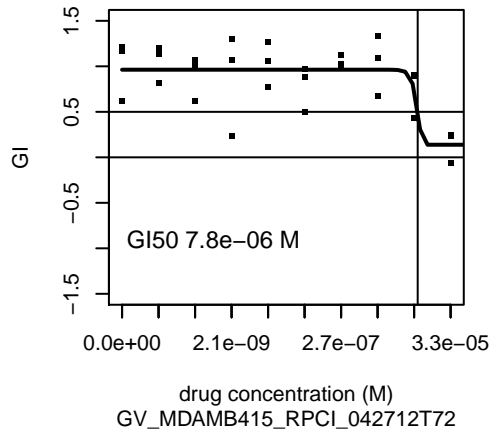

**MDAMB436 : CI-52**

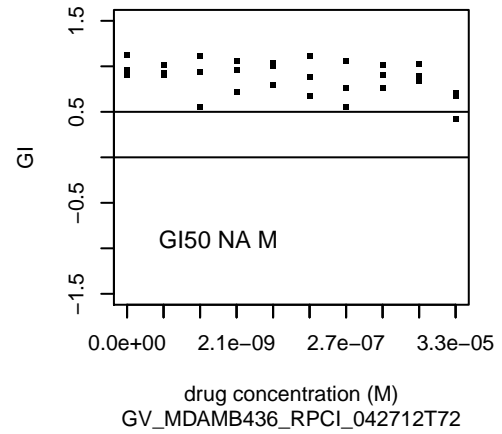

MDAMB453 : CI-52

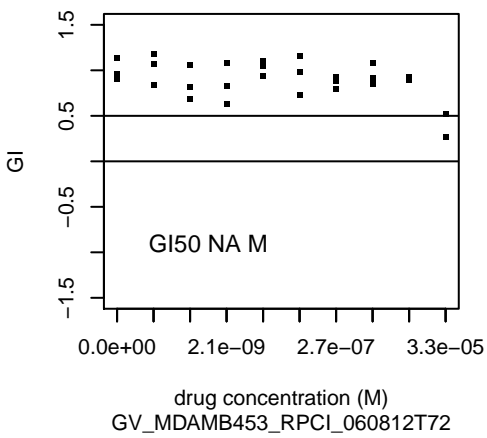

MDAMB468 : CI-52

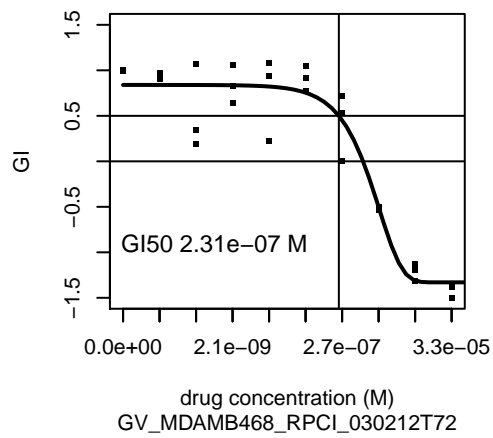

MDAMB468 : CI-52

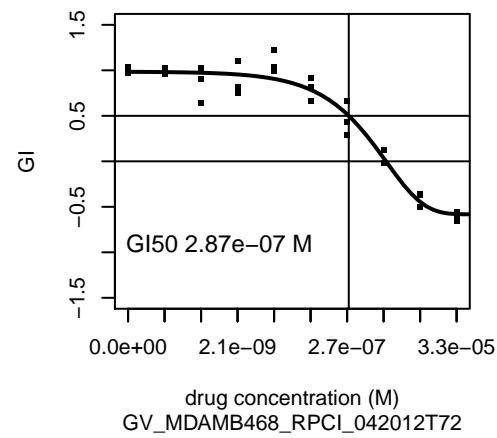

MX1 : CI-52

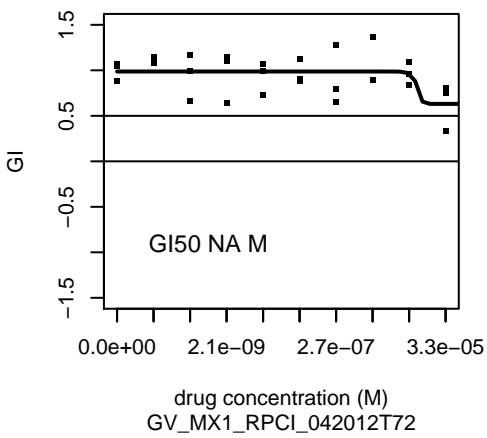

MX1 : CI-52

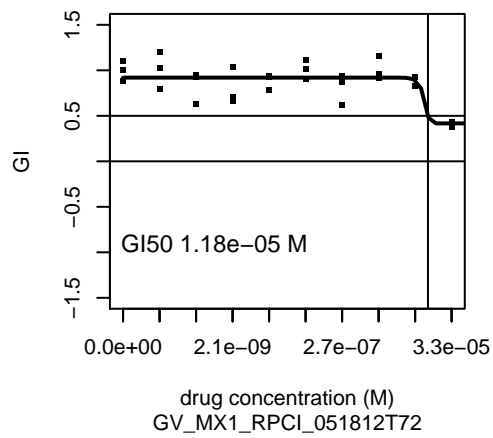

SKBR3 : CI-52

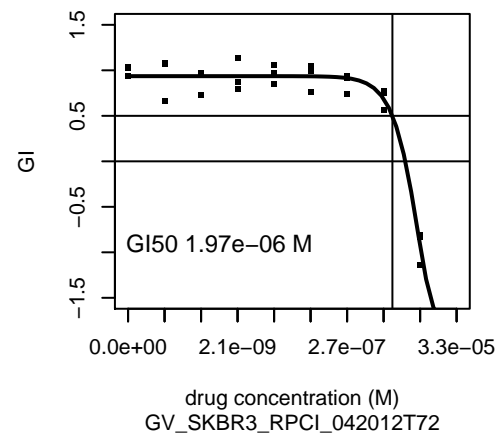

SUM149PT : CI-52

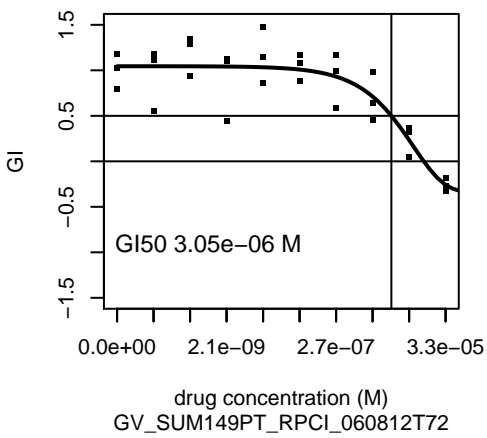

SUM185PE : CI-52

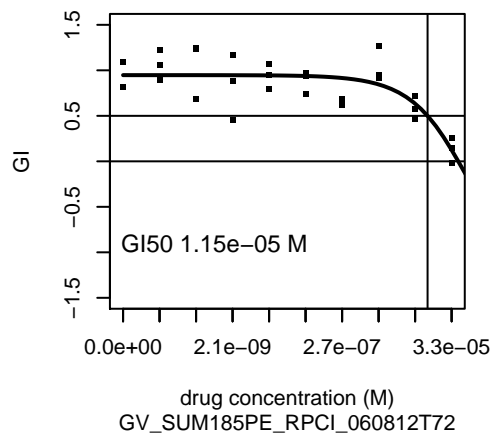

UACC812 : CI-52

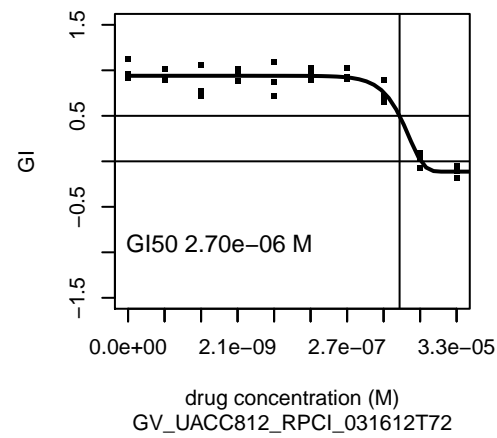

UACC812 : CI-52

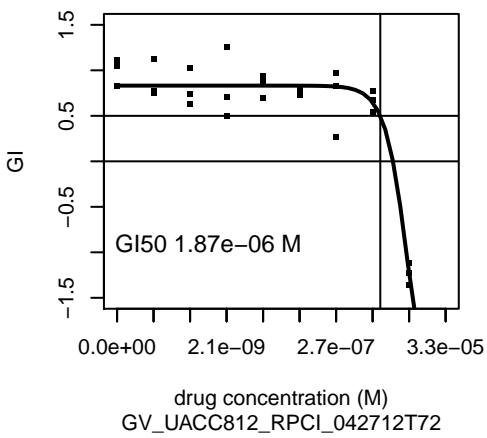

UACC893 : CI-52

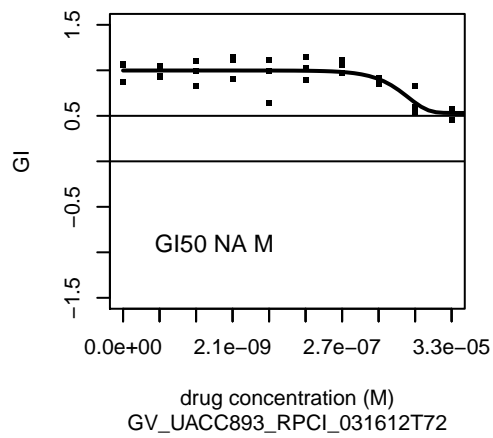

ZR751 : CI-52

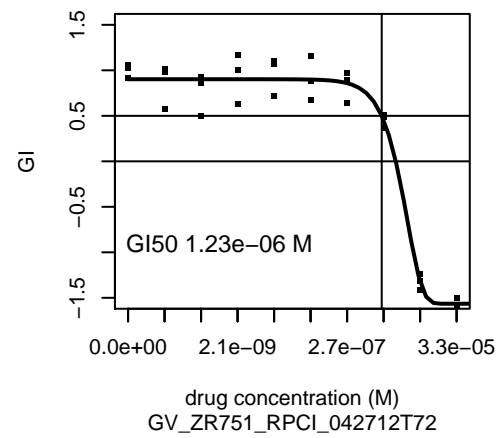

ZR7530 : CI-52

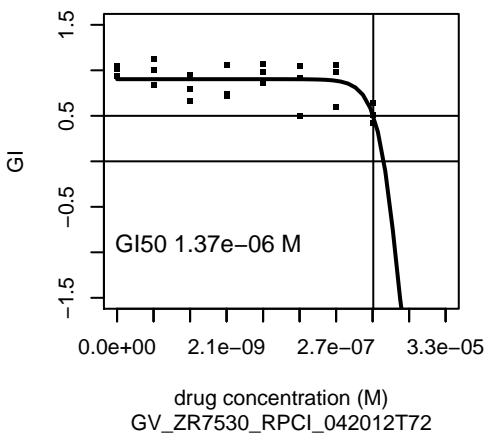

ZR75B : CI-52

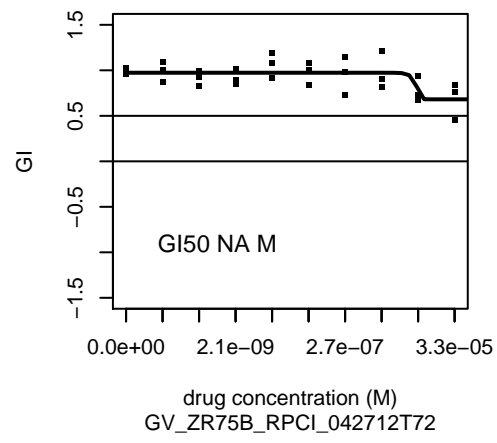

Supplement: Supplementary file 2 [file 1]
